# Supplementary material for: Comparative linkage mapping of diploid, tetraploid, and hexaploid Avena species suggests extensive chromosome rearrangement in ancestral diploids
Source: PubMed Central journal article supplement (PMC6707241; doi:10.1038/s41598-019-48639-7), 2019-08-23

## Supplementary Materials

Comparative linkage mapping of diploid, tetraploid, and hexaploid *Avena* species suggests extensive chromosome rearrangement in ancestral diploids.

Robert G. Latta<sup>1\*</sup>  
Wubishet A. Bekele<sup>2</sup>  
Charlene P. Wight<sup>2</sup>  
Nicholas A. Tinker<sup>2</sup>

- 1 Dept. of Biology, Dalhousie University, 1355 Oxford St., Halifax, NS, B3H 4R2, Canada. Phone: 902-494-2737, Fax: 902-494-3736, Email: Robert.Latta@Dal.ca.
- 2 Ottawa Research and Development Centre, Agriculture & Agri-Food Canada, 960 Carling Ave., Ottawa, Ontario, K1A 0C6, Canada.

\* Author for Correspondence.

### Contents:

#### Description of Supplementary Data (Accompanying .xlsx file)

- Genotype calls for all loci in both mapping populations
- Error calls
- Paralogs and homologs

#### Supplementary Methods

- MSTMap
- Haplotag Clusters, Paralogs and Presence/Absence Variants (PAVs)
- Mapping Secondary Loci
- Error Filtering.
- Supp. Methods Figures A-D

#### Supplementary Tables

- Table S1. Number of Loci Detected
- Table S2. Overlap of single and double digest GBS libraries in *A. barbata*
- Table S3. Statistical significance of homologs/paralogs between pairs of linkage groups

#### Supplementary Figures

- Figure S1. Comparison of Single and Double digest GBS linkage map in *A. barbata*.
- Figure S2. Hypothesized evolutionary transition between A and B genome karyotypes

## Description of Supplementary Data (Accompanying .xlsx file)

GBS raw sequence read data are deposited at the NCBI short read archive under project numbers PRJNA517481 for the diploid the *A. strigosa* X *wiestii* mapping population, and PRJNA517323 for *A. barbata*.

However we also want to make available the genotype calls, error calls, and homologs identified in this study, since these are likely to be more accessible to researchers wishing to extend/examine our work.

### 1) GBS Markers mapped in *Avena barbata*

For each biallelic locus and Presence-Absence Variant, we give the sequence of the GBS tags (alleles), the inferred position on the linkage map, and the genotype calls for all RILs.

### 2) GBS Markers mapped in *Avena strigosa* X *wiestii*

As above for the diploid mapping population

### 3-5) Genotyping Error Calls

For each of the stringently filtered loci that we used to construct the framework map, we screened the map for likely genotyping errors as described in Supplementary Methods. The data file lists the genotype calls for each RIL before and after error checking, and compares the inferred map positions for the corrected vs uncorrected linkage maps.

### 6) Homologous Markers across maps

Sorted by species, with the lower ploidy mapping population on the left. Gives name, and map location for each of the inferred homologous tag pairs, and the number of base pair mismatches

### 7) Paralogs within *A. barbata*

As above for Homologs between species. Sorted by map position with the lower number linkage group (e.g. Ab\_1 vs Ab\_12) on the left

## Supplementary Methods

We present here some illustrations and details of our analysis. Note that figures referred to in these supplementary methods are labelled A-D, to distinguish them from figures S1, S2, *etc.* cited in the main text.

### MSTMap

The first step of the MSTMap algorithm separates loci into linkage groups (prior to ordering the markers) based upon the number of recombination events observed between them. Since loci on separate chromosomes may show less than 50% recombination by chance, a threshold number of observed recombinations is set based on the probability of observing a given number of recombinations between unlinked loci. Then linkage groups are formed such that loci within a group have observed recombination less than the threshold to at least one other member of the group. Threshold is set by the researcher through a parameter,  $e$ , which defines the probability of observing a given recombination level by chance between unlinked markers (through a calculation given in Wu et al., 2014<sup>45</sup>). A high value of  $e$  gives a single linkage group with numerous gaps of ~50 cM between adjacent markers. We gradually reduced  $e$  in successive runs until the correct number of linkage groups was obtained. Further reductions of  $e$  would eventually begin to break up linkage groups at some of the longer gaps between markers (such as the 20cM gap on Ab\_2).

### Haplotag Clusters, Paralogs and Presence/Absence Variants (PAVs)

The Haplotag pipeline (Tinker et al, 2016<sup>44</sup>) treats the entire GBS tag sequence as a haplotype which may represent a segregating allele at a locus. This is in contrast to the SNP-based approach which considers each SNP as a separate (though of course possibly tightly linked) locus. Figure A shows an example of Haplotag output for a cluster of seven tags with similar sequences but with more than one SNP. These haplotypes can be resolved into three segregating biallelic loci and one segregating presence absence variant. Loci 1 and 2 appear to be tandem repeats – they show very tight linkage disequilibrium and map to the same position (Fig B). Locus 3 is unlinked to loci 1 and 2. Haplotag identifies these loci by eliminating tag pairings that could not be alleles at a single locus. For example, a model that posits the tags 140113 and 140115 (mesic alleles at locus 2 and 3) are alleles at a single locus would be rejected because it would be missing from too many taxa as well as exceeding the threshold for heterozygosity. The remaining Tag 140117 shows fixed differences between the parents (it is only present in the xeric ecotype), and shows Mendelian segregation. It also shows strong association with the xeric allele at loci 1 and 2 in the recombinants and maps near to those loci (Fig B)

### Mapping Secondary Loci

Figure B illustrates our method for placing secondary loci (less stringently filtered), PAV's, and RFLP and AFLP markers on the linkage map. The recombination fraction is computed for each marker with each bin of the framework map. Recombination fractions are roughly 0.5 for most bins, indicating no linkage. Map positions are assigned to the bin with the lowest recombination fraction.

The traces show the loci and PAV from the cluster of tags shown in Fig A. Loci 1 and 2 (red and yellow) and the PAV (green) map very close to each other. Loci 1 and 2 have identical traces, but the increased error in the PAV gives a slightly higher minimum RF. Locus 3 from that cluster maps to a different chromosome (light blue). Most loci showed close linkage (98% of  $rf \leq 0.1$ , Fig C) to one bin of the framework map and extensive recombination ( $rf \sim 0.5$ ) to most other bins.

### Error Filtering.

During our map construction, the stringently filtered loci were further screened for likely genotyping errors after an initial map was inferred. Fig D shows genotype data for selected RILs over a short region of LG 1 in the *A. strigosa* X *wiestii* map. The GBS markers between the solid black lines were originally inferred to cover 6.7 cM. However, each recombination event in this region produced double recombination around a single marker – an unlikely occurrence. Moreover, each of these putative double recombinants was found in heterozygous state, which is also highly unlikely in a selfing organism. When the original genotype calls (left) are thinned for errors (by removing any double recombinant involving fewer than 3 markers within less than 2 cM) there is seen to be no recombination events among these markers, placing them all within a single “bin”.

Figure A: Example output of the Haplotag pipeline for a cluster of GBS tags that resolve into three segregating loci and one Presence-Absence Variant (PAV). A sample of genotype calls is given on the next page.

### A\_barbata\_Map\_Output GBS passport file for tag cluster: RGLP53537

Cluster Consensus: TGCAGKGCCTGGCRGAGGCCGTCGACTCNTGCGGCCTCCTRCGGGCCGACMTKCTCYCGYTCT

| TagID  | Count* | TGCAG | 1         | 2               | 3            | 4           | 5            | 6 |
|--------|--------|-------|-----------|-----------------|--------------|-------------|--------------|---|
| 140110 | 85     | TGCAG | GCCTGGCA  | CGAGGCCGTCGACTC | CTGCGGCCTCCT | ACGGGCCGACC | TGCTCCGCTCT  |   |
| 140112 | 87     | TGCAG | GCCTGGCG  | CGAGGCCGTCGACTC | CTGCGGCCTCCT | CGGGGCCGACA | TTCTCCGCTCT  |   |
| 140113 | 97     | TGCAG | GCCTGGCG  | CGAGGCCGTCGACTC | CTGCGGCCTCCT | CGGGGCCGACC | TGCTCCGCTCT  |   |
| 140114 | 81     | TGCAG | GCCTGGCG  | CGAGGCCGTCGACTC | CTGCGGCCTCCT | CGGGGCCGACC | TGCTCCGCTCT  |   |
| 140115 | 95     | TGCAG | GCCTGGCG  | CGAGGCCGTCGACTC | CTGCGGCCTCCT | ACGGGCCGACC | TGCTCCGCTCT  |   |
| 140117 | 85     | TGCAG | GCCTGGCG  | CGAGGCCGTCGACTC | CTGCGGCCTCCT | ACGGGCCGACC | TGCTCTCGCTCT |   |
| 140118 | 99     | TGCAG | TGCCTGGCG | CGAGGCCGTCGACTC | CTGCGGCCTCCT | CGGGGCCGACA | TTCTCCGCTCT  |   |

\*Count = number of taxa that contain this haplotype  
(For details of model selection click [HERE](#) )

Best model #1 fits 183 genotypes, with 2% heterozygotes.

Consensus: TGCAGKGCCTGGCGGAGGCCGTCGACTCCTGCGGCCTCCTGCGGGCCGACATTCTCCCGCTCT

| TagID  | Count | TGCAG | 1           | 2              | 3            | 4           | 5            | 6 |
|--------|-------|-------|-------------|----------------|--------------|-------------|--------------|---|
| 140112 | 87    | TGCAG | GCCTGGCGCG  | GAGGCCGTCGACTC | CTGCGGCCTCCT | GCGGGCCGACA | TTCTCCCGCTCT |   |
| 140118 | 99    | TGCAG | TGCCTGGCGCG | GAGGCCGTCGACTC | CTGCGGCCTCCT | GCGGGCCGACA | TTCTCCCGCTCT |   |

Best model #2 fits 179 genotypes, with 1% heterozygotes.

Consensus: TGCAGGGCCTGGCRGAGGCCGTCGACTCYTGCGGCCTCCTACGGGCCGACCTGCTCCCGCTCT

| TagID  | Count | TGCAG | 1         | 2               | 3            | 4           | 5            | 6 |
|--------|-------|-------|-----------|-----------------|--------------|-------------|--------------|---|
| 140110 | 85    | TGCAG | GGCCTGGCA | CGAGGCCGTCGACTC | CTGCGGCCTCCT | ACGGGCCGACC | TGCTCCCGCTCT |   |
| 140115 | 95    | TGCAG | GGCCTGGCG | CGAGGCCGTCGACTC | CTGCGGCCTCCT | ACGGGCCGACC | TGCTCCCGCTCT |   |

Best model #3 fits 176 genotypes, with 1% heterozygotes.

Consensus: TGCAGGGCCTGGCGGAGGCCGTCGACTCSTGCGGCCTCCTGCGGGCCGACCTGCTCCCGCTCT

| TagID  | Count | TGCAG | 1           | 2              | 3            | 4           | 5            | 6 |
|--------|-------|-------|-------------|----------------|--------------|-------------|--------------|---|
| 140113 | 97    | TGCAG | GGCCTGGCGCG | GAGGCCGTCGACTC | CTGCGGCCTCCT | GCGGGCCGACC | TGCTCCCGCTCT |   |
| 140114 | 81    | TGCAG | GGCCTGGCGCG | GAGGCCGTCGACTC | CTGCGGCCTCCT | GCGGGCCGACC | TGCTCCCGCTCT |   |

....Cont'd

Fig A (cont'd)

Best selected models are on the left ----- haplotypes excluded from the selected locus model(s) are on the right

| TaxaID | Project  | TaxaName | Locus Model and haplotype IDs |        |         |        |         |        |          |
|--------|----------|----------|-------------------------------|--------|---------|--------|---------|--------|----------|
|        |          |          | Locus-1                       |        | Locus-2 |        | Locus-3 |        | No-model |
|        |          |          | 140112                        | 140118 | 140110  | 140115 | 140113  | 140114 | 140117   |
| M-2084 | DeepRead | M-2084   | 0                             | 30     | 0       | 28     | 34      | 0      | 0        |
| M-1884 | Parents  | M-1884   | 0                             | 11     | 0       | 9      | 8       | 0      | 0        |
| M-286  | Parents  | M-286    | 0                             | 5      | 0       | 10     | 7       | 0      | 0        |
| M-786  | Parents  | M-786    | 0                             | 8      | 0       | 4      | 8       | 0      | 0        |
| X-189  | DeepRead | X-189    | 55                            | 0      | 23      | 0      | 0       | 26     | 22       |
| X-187  | Parents  | X-187    | 10                            | 0      | 6       | 0      | 0       | 7      | 9        |
| X-287  | Parents  | X-287    | 9                             | 0      | 6       | 0      | 0       | 0      | 5        |
| X-589  | Parents  | X-589    | 5                             | 0      | 2       | 0      | 0       | 4      | 6        |
| F7-001 | RILs     | F7-001   | 4                             | 0      | 7       | 0      | 8       | 0      | 3        |
| F7-002 | RILs     | F7-002   | 6                             | 0      | 9       | 0      | 0       | 4      | 10       |
| F7-003 | RILs     | F7-003   | 0                             | 9      | 0       | 8      | 12      | 0      | 0        |
| F7-004 | RILs     | F7-004   | 7                             | 0      | 5       | 0      | 6       | 0      | 2        |
| F7-005 | RILs     | F7-005   | 10                            | 0      | 5       | 0      | 3       | 2      | 8        |
| F7-006 | RILs     | F7-006   | 6                             | 0      | 11      | 0      | 0       | 2      | 8        |
| F7-007 | RILs     | F7-007   | 0                             | 8      | 0       | 12     | 0       | 15     | 0        |
| F7-008 | RILs     | F7-008   | 8                             | 0      | 6       | 0      | 10      | 0      | 5        |
| F7-009 | RILs     | F7-009   | 0                             | 6      | 0       | 4      | 3       | 0      | 0        |
| F7-010 | RILs     | F7-010   | 0                             | 13     | 0       | 4      | 12      | 0      | 0        |
| F7-011 | RILs     | F7-011   | 0                             | 2      | 0       | 0      | 2       | 0      | 0        |
| F7-012 | RILs     | F7-012   | 7                             | 0      | 7       | 0      | 5       | 0      | 5        |
| F7-013 | RILs     | F7-013   | 11                            | 0      | 3       | 0      | 9       | 0      | 4        |
| F7-014 | RILs     | F7-014   | 7                             | 0      | 3       | 0      | 13      | 0      | 7        |
| F7-015 | RILs     | F7-015   | 0                             | 11     | 0       | 10     | 0       | 6      | 0        |
| F7-016 | RILs     | F7-016   | 0                             | 5      | 0       | 5      | 7       | 0      | 0        |
| F7-017 | RILs     | F7-017   | 0                             | 12     | 0       | 7      | 15      | 0      | 0        |
| F7-018 | RILs     | F7-018   | 0                             | 13     | 0       | 9      | 0       | 11     | 0        |
| F7-019 | RILs     | F7-019   | 7                             | 0      | 2       | 0      | 3       | 0      | 4        |
| F7-020 | RILs     | F7-020   | 0                             | 5      | 0       | 4      | 5       | 0      | 0        |
| F7-021 | RILs     | F7-021   | 0                             | 4      | 0       | 2      | 4       | 0      | 0        |
| F7-022 | RILs     | F7-022   | 12                            | 0      | 7       | 0      | 0       | 2      | 10       |
| F7-023 | RILs     | F7-023   | 0                             | 12     | 0       | 6      | 6       | 0      | 0        |
| F7-024 | RILs     | F7-024   | 0                             | 7      | 0       | 5      | 12      | 0      | 0        |
| F7-025 | RILs     | F7-025   | 0                             | 8      | 0       | 9      | 22      | 0      | 0        |
| F7-026 | RILs     | F7-026   | 0                             | 14     | 0       | 12     | 0       | 8      | 0        |
| F7-027 | RILs     | F7-027   | 7                             | 0      | 11      | 0      | 0       | 5      | 9        |

Figure B. Traces of the recombination fraction for each Locus in Fig S1A, against each bin of the framework map

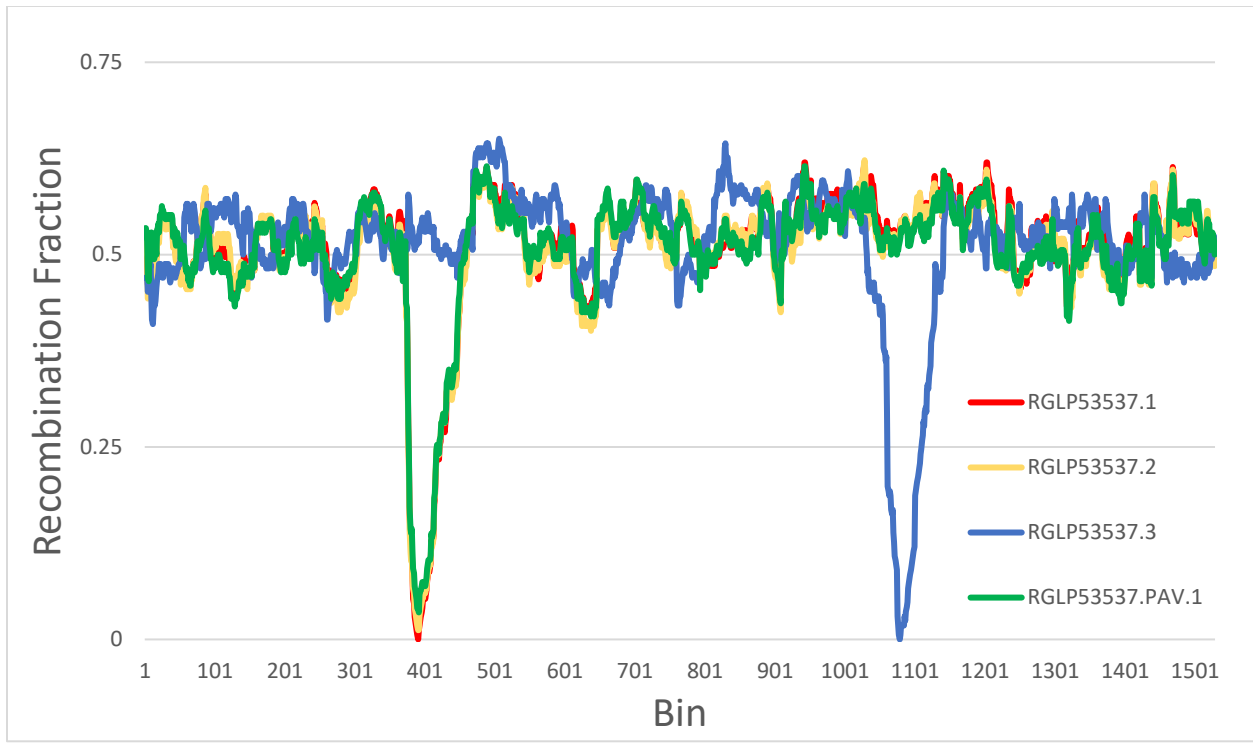

Fig C. Frequency distribution of recombination fraction between secondary loci and PAVs and the nearest marker of the framework map in *A. barbata* and *A. strigosa X wiestii*)

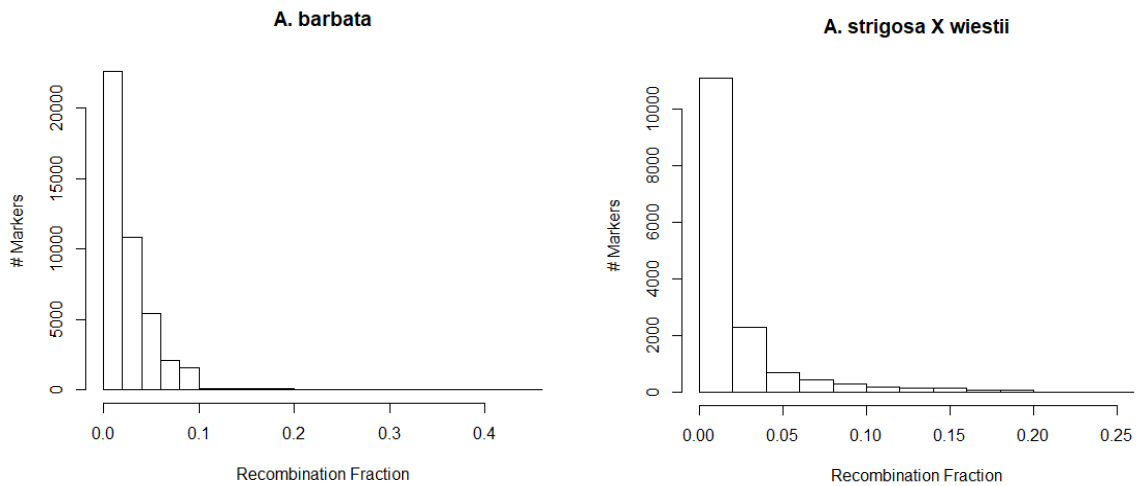

Figure D: Illustration of error checking in the framework map. A selection of RILs from the SW mapping population is illustrated. RILs have been selected to illustrate errors, thus RILs with errors are over-represented in this example. On the left of each pair is the original genotype call from Haplotag (1 = *wiestii* homozygote, 2 = heterozygote, 3- *strigosa* homozygote), while on the right are the genotype calls once errors have been removed and treated as missing data. The original map positions indicate 7 cM in the span indicated by the black lines, but this is mostly attributable to erroneous heterozygote calls inflating the rate of (double) recombination. The complete set of error calls are given in the Supplementary Data.

| Locus      | LG | Pos   | NewPos  | SW_002 | SW_014 | SW_015 | SW_019 | SW_024 | SW_025 | SW_031 | SW_032 | SW_036 | SW_048 | SW_069 | SW_073 | SW_078 | SW_079 | SW_080 | SW_082 | SW_091 |
|------------|----|-------|---------|--------|--------|--------|--------|--------|--------|--------|--------|--------|--------|--------|--------|--------|--------|--------|--------|--------|
| Oat19439.1 | 1  | 186   | 100.289 | 3 3    | 3 3    | 1 1    | 1 1    | 2 2    | 1 1    | 3 3    | 1 1    | 1 1    | 1 1    | 1 1    | 1 1    | 1 1    | 3 3    | 1 1    | 3 3    | 2 2    |
| Oat1246.1  | 1  | 188.3 | 102.128 | 3 3    | 3 3    | 1 1    | 1 1    | 2 2    | 3 3    | 3 3    | 1 1    | 1 1    | 1 1    | 1 1    | 1 1    | 1 1    | 3 3    | 1 1    | 3 3    | 2 2    |
| Oat3348.1  | 1  | 190.7 | 102.128 | 3 3    | 3 3    | 1 1    | 1 1    | 3 NA   | 3 3    | 2 NA   | 1 1    | 1 1    | 1 1    | 1 1    | 1 1    | 1 1    | 3 3    | 1 1    | 3 3    | 2 2    |
| Oat27635.1 | 1  | 189.5 | 102.232 | 3 3    | 3 3    | 1 1    | 1 1    | 2 2    | 3 3    | 3 3    | 1 1    | 1 1    | 1 1    | 1 1    | 1 1    | 1 1    | 3 3    | 1 1    | 3 3    | 2 2    |
| Oat13269.1 | 1  | 192   | 102.336 | 3 3    | 3 3    | 1 1    | 1 1    | 2 2    | 3 3    | 3 3    | 1 1    | 1 1    | 1 1    | 1 1    | 1 1    | 1 1    | 3 3    | 1 1    | 2 NA   | 2 2    |
| Oat36708.1 | 1  | 193.7 | 103.088 | 3 3    | 3 3    | 1 1    | 1 1    | 2 2    | 3 3    | 3 3    | 1 1    | 1 1    | 1 1    | 1 1    | 1 1    | 1 1    | 3 3    | 1 1    | 3 3    | 3 3    |
| Oat34471.1 | 1  | 194.3 | 103.088 | 3 3    | 3 3    | 1 1    | 1 1    | 2 2    | 3 3    | 3 3    | 1 1    | 1 1    | 1 1    | 1 1    | 1 1    | 1 1    | 3 3    | 2 NA   | 3 3    | 3 3    |
| Oat29128.1 | 1  | 195.1 | 103.088 | 3 3    | 3 3    | 1 1    | 1 1    | 2 2    | 3 3    | 3 3    | 1 1    | 1 1    | 1 1    | 2 NA   | 1 1    | 2 NA   | 3 3    | 1 1    | 3 3    | 3 3    |
| Oat3236.1  | 1  | 195.6 | 103.088 | 3 3    | 3 3    | 1 1    | 1 1    | 2 2    | 3 3    | 3 3    | 1 1    | 1 1    | 1 1    | 1 1    | 1 1    | 1 1    | 3 3    | 1 1    | 3 3    | 3 3    |
| Oat4822.1  | 1  | 195.6 | 103.088 | 3 3    | 3 3    | 1 1    | 1 1    | 2 2    | 3 3    | 3 3    | 1 1    | 1 1    | 1 1    | 1 1    | 1 1    | 1 1    | 3 3    | 1 1    | 3 3    | 3 3    |
| Oat13926.1 | 1  | 195.6 | 103.088 | 3 3    | 3 3    | 1 1    | 1 1    | 2 2    | 3 3    | 3 3    | 1 1    | 1 1    | 1 1    | 1 1    | 1 1    | 1 1    | 3 3    | 1 1    | 3 3    | 3 3    |
| Oat36793.1 | 1  | 195.6 | 103.088 | 3 3    | 3 3    | 1 1    | 1 1    | 2 2    | 3 3    | 3 3    | 1 1    | 1 1    | 1 1    | 1 1    | 1 1    | 1 1    | 3 3    | 1 1    | 3 3    | 3 3    |
| Oat37650.1 | 1  | 195.6 | 103.088 | 3 3    | 3 3    | 1 1    | 1 1    | 2 2    | 3 3    | 3 3    | 1 1    | 1 1    | 1 1    | 1 1    | 1 1    | 1 1    | 3 3    | 1 1    | 3 3    | 3 3    |
| Oat40544.1 | 1  | 195.6 | 103.088 | 3 3    | 3 3    | 1 1    | 1 1    | 2 2    | 3 3    | 3 3    | 1 1    | 1 1    | 1 1    | 1 1    | 1 1    | 1 1    | 3 3    | 1 1    | 3 3    | 3 3    |
| Oat19266.1 | 1  | 196.1 | 103.088 | 3 3    | 3 3    | 1 1    | 2 NA   | 2 2    | 3 3    | 2 NA   | 1 1    | 1 1    | 1 1    | 1 1    | 1 1    | 1 1    | 3 3    | 1 1    | 3 3    | 3 3    |
| Oat18907.1 | 1  | 197.9 | 103.088 | 3 3    | 2 NA   | 1 1    | 1 1    | 2 2    | 3 3    | 3 3    | 1 1    | 1 1    | 1 1    | 1 1    | 1 1    | 1 1    | 2 NA   | 1 1    | 3 3    | 3 3    |
| Oat28613.1 | 1  | 198.4 | 103.088 | 3 3    | 3 3    | 1 1    | 1 1    | 2 2    | 3 3    | 3 3    | 1 1    | 1 1    | 1 1    | 1 1    | 1 1    | 1 1    | 3 3    | 1 1    | 3 3    | 3 3    |
| Oat4480.1  | 1  | 199.2 | 103.088 | 3 3    | 3 3    | 1 1    | 1 1    | 2 2    | 3 3    | 3 3    | 1 1    | 1 1    | 2 NA   | 1 1    | 1 1    | 1 1    | 3 3    | 1 1    | 3 3    | 3 3    |
| Oat18906.1 | 1  | 200   | 103.088 | 3 3    | 3 3    | 1 1    | 1 1    | 2 2    | 3 3    | 3 3    | 2 NA   | 1 1    | 1 1    | 1 1    | 2 NA   | 1 1    | 3 3    | 1 1    | 3 3    | 3 3    |
| Oat25536.1 | 1  | 201   | 103.626 | 3 3    | 3 3    | 1 1    | 1 1    | 2 2    | 3 3    | 3 3    | 1 1    | 3 3    | 1 1    | 1 1    | 2 NA   | 1 1    | 3 3    | 1 1    | 3 3    | 3 3    |
| Oat1791.1  | 1  | 201.6 | 103.626 | 3 3    | 3 3    | 1 1    | 1 1    | 2 2    | 3 3    | 3 3    | 1 1    | 3 3    | 1 1    | 1 1    | 1 1    | 1 1    | 3 3    | 1 1    | 3 3    | 3 3    |
| Oat35330.1 | 1  | 202.2 | 104.164 | 3 3    | 3 3    | 1 1    | 1 1    | 2 2    | 3 3    | 3 3    | 1 1    | 3 3    | 1 1    | 1 1    | 1 1    | 1 1    | 3 3    | 1 1    | 3 3    | 3 3    |
| Oat37523.1 | 1  | 203.5 | 105.239 | 3 3    | 3 3    | 1 1    | 1 1    | 2 2    | 3 3    | 3 3    | 1 1    | 3 3    | 3 3    | 1 1    | 1 1    | 1 1    | 3 3    | 1 1    | 3 3    | 3 3    |
| Oat2358.1  | 1  | 204   | 105.765 | 3 3    | 3 3    | 1 1    | 1 1    | 2 2    | 3 3    | 3 3    | 1 1    | 3 3    | 3 3    | 1 1    | 1 1    | 1 1    | 3 3    | 1 1    | 3 3    | 3 3    |
| Oat4691.1  | 1  | 204   | 105.765 | 3 3    | 3 3    | 1 1    | 1 1    | 2 2    | 3 3    | 3 3    | 1 1    | 3 3    | 3 3    | 1 1    | 1 1    | 1 1    | 3 3    | 1 1    | 3 3    | 3 3    |
| Oat6600.1  | 1  | 204   | 105.765 | 3 3    | 3 3    | 1 1    | 1 1    | 2 2    | 3 3    | 3 3    | 1 1    | 3 3    | 3 3    | 1 1    | 1 1    | 1 1    | 3 3    | 1 1    | 3 3    | 3 3    |
| Oat15406.1 | 1  | 204   | 105.765 | 3 3    | 3 3    | 1 1    | 1 1    | 2 2    | 3 3    | 3 3    | 1 1    | 3 3    | 3 3    | 1 1    | 1 1    | 1 1    | 3 3    | 1 1    | 3 3    | 3 3    |
| Oat20362.1 | 1  | 204   | 105.765 | 3 3    | 3 3    | 1 1    | 1 1    | 2 2    | 3 3    | 3 3    | 1 1    | 3 3    | 3 3    | 1 1    | 1 1    | 1 1    | 3 3    | 1 1    | 3 3    | 3 3    |
| Oat34353.1 | 1  | 204   | 105.765 | 3 3    | 3 3    | 1 1    | 1 1    | 2 2    | 3 3    | 3 3    | 1 1    | 3 3    | 3 3    | 1 1    | 1 1    | 1 1    | 3 3    | 1 1    | 3 3    | 3 3    |



## Supplementary Tables

**Table S1.** Number of biallelic and presence-absence variant (PAV) markers identified for each GBS library in each mapping population

|           |                      | <i>A. strigosa</i> x |                   |                  |
|-----------|----------------------|----------------------|-------------------|------------------|
|           |                      | <i>A. wiestii</i>    | <i>A. barbata</i> |                  |
|           |                      | Double<br>Digest     | Double<br>Digest  | Single<br>Digest |
| Biallelic | Stringently filtered | 3170                 | 4015              | 1731             |
|           | Secondary            | 3481                 | 5133              | 1404             |
| PAV       | Clustered            | 3374                 | 6738              | 3202             |
|           | Singleton            | 5342                 | 16937             | 4015             |

**Table S2.** Number of Loci identified by both Single and Double digest GbS libraries in *A. barbata*. The total number of each marker type identified in each library is also given (e.g. out of 8625 biallelic loci in the double digest library, 369 were also identified in the single digest library)

|                |           | Double Digest: |       |       |
|----------------|-----------|----------------|-------|-------|
|                |           | Biallelic      | PAV   | Total |
| Single Digest: |           |                |       |       |
|                | Biallelic | 369            | 42    | 2968  |
|                | PAV       | 48             | 731   | 7217  |
|                | Total     | 8652           | 23675 |       |

**Table S3:** Statistical significance of the number of homologs/paralogs between pairs of linkage groups. Given the locations of all markers that had a homolog (or paralog in table S3B), the pairings between these markers were randomized 10,000X. For each pair of LGs, the fraction of randomized data sets which exceeded the observed number of homologs for that pair is given. Pairs with < 0.05 (ie occurred significantly more often than expected by chance alone) are highlighted in green.

Table S3A. Homologies between *A. barbata* and *A. strigosa* X *A. wiestii*

|      | Ab_1  | Ab_2  | Ab_3  | Ab_4  | Ab_5  | Ab_6  | Ab_7  | Ab_8  | Ab_9  | Ab_10 | Ab_11 | Ab_12 | Ab_13 | Ab_14 |
|------|-------|-------|-------|-------|-------|-------|-------|-------|-------|-------|-------|-------|-------|-------|
| SW_1 | 0.000 | 1.000 | 1.000 | 1.000 | 1.000 | 1.000 | 1.000 | 1.000 | 1.000 | 0.000 | 0.764 | 0.582 | 0.414 | 1.000 |
| SW_2 | 1.000 | 0.000 | 1.000 | 1.000 | 1.000 | 1.000 | 1.000 | 1.000 | 1.000 | 0.999 | 0.969 | 0.000 | 0.379 | 1.000 |
| SW_3 | 1.000 | 1.000 | 0.000 | 1.000 | 1.000 | 1.000 | 1.000 | 0.000 | 1.000 | 1.000 | 0.000 | 0.971 | 0.996 | 1.000 |
| SW_4 | 1.000 | 1.000 | 1.000 | 0.000 | 1.000 | 1.000 | 1.000 | 0.994 | 0.000 | 0.993 | 0.952 | 1.000 | 1.000 | 1.000 |
| SW_5 | 1.000 | 1.000 | 1.000 | 1.000 | 0.000 | 1.000 | 1.000 | 1.000 | 0.000 | 0.000 | 1.000 | 0.996 | 0.935 | 1.000 |
| SW_6 | 1.000 | 1.000 | 1.000 | 1.000 | 1.000 | 0.000 | 1.000 | 0.000 | 1.000 | 1.000 | 0.616 | 0.750 | 0.000 | 0.998 |
| SW_7 | 1.000 | 1.000 | 1.000 | 1.000 | 1.000 | 1.000 | 0.000 | 1.000 | 0.997 | 1.000 | 1.000 | 0.998 | 0.959 | 0.000 |



Table S3C Homologies between *A. barbata* and *A. sativa*

|       | Ab_1  | Ab_2  | Ab_3  | Ab_4  | Ab_5  | Ab_6  | Ab_7  | Ab_8  | Ab_9  | Ab_10 | Ab_11 | Ab_12 | Ab_13 | Ab_14 |
|-------|-------|-------|-------|-------|-------|-------|-------|-------|-------|-------|-------|-------|-------|-------|
| Mrg1  | 0.000 | 1.000 | 1.000 | 0.000 | 1.000 | 1.000 | 1.000 | 1.000 | 0.154 | 0.056 | 0.000 | 0.577 | 0.886 | 0.999 |
| Mrg2  | 1.000 | 1.000 | 1.000 | 1.000 | 1.000 | 1.000 | 0.000 | 0.997 | 1.000 | 0.996 | 1.000 | 1.000 | 0.978 | 0.000 |
| Mrg3  | 0.746 | 1.000 | 1.000 | 0.327 | 0.028 | 1.000 | 0.011 | 1.000 | 0.629 | 0.324 | 0.391 | 1.000 | 1.000 | 0.634 |
| Mrg4  | 0.998 | 0.961 | 1.000 | 1.000 | 0.983 | 0.000 | 0.997 | 1.000 | 0.891 | 1.000 | 1.000 | 0.655 | 0.000 | 0.649 |
| Mrg5  | 1.000 | 0.016 | 0.683 | 0.994 | 1.000 | 0.000 | 0.999 | 0.993 | 0.985 | 0.872 | 0.051 | 0.044 | 0.000 | 0.987 |
| Mrg6  | 1.000 | 1.000 | 1.000 | 0.205 | 0.000 | 1.000 | 1.000 | 1.000 | 0.000 | 1.000 | 0.690 | 1.000 | 1.000 | 1.000 |
| Mrg8  | 0.000 | 0.000 | 1.000 | 0.997 | 1.000 | 1.000 | 1.000 | 0.996 | 0.992 | 0.000 | 1.000 | 0.000 | 0.014 | 0.864 |
| Mrg9  | 0.823 | 1.000 | 0.987 | 1.000 | 0.000 | 0.964 | 1.000 | 1.000 | 0.290 | 0.008 | 1.000 | 1.000 | 1.000 | 1.000 |
| Mrg11 | 1.000 | 1.000 | 0.000 | 0.401 | 1.000 | 0.176 | 0.999 | 1.000 | 0.854 | 1.000 | 0.000 | 0.603 | 1.000 | 0.588 |
| Mrg12 | 0.000 | 0.999 | 1.000 | 1.000 | 1.000 | 1.000 | 0.000 | 1.000 | 0.999 | 1.000 | 0.029 | 0.973 | 0.988 | 0.000 |
| Mrg13 | 1.000 | 0.000 | 1.000 | 1.000 | 1.000 | 0.965 | 1.000 | 0.833 | 0.665 | 0.733 | 0.421 | 0.002 | 1.000 | 1.000 |
| Mrg15 | 1.000 | 1.000 | 0.000 | 1.000 | 1.000 | 0.940 | 1.000 | 0.000 | 1.000 | 0.663 | 1.000 | 1.000 | 1.000 | 1.000 |
| Mrg17 | 0.894 | 0.278 | 0.995 | 1.000 | 1.000 | 0.516 | 0.000 | 1.000 | 1.000 | 0.789 | 0.483 | 1.000 | 0.000 | 0.737 |
| Mrg18 | 0.000 | 1.000 | 1.000 | 1.000 | 1.000 | 1.000 | 1.000 | 1.000 | 1.000 | 0.000 | 0.842 | 1.000 | 0.514 | 0.999 |
| Mrg19 | 0.005 | 1.000 | 0.000 | 0.847 | 0.999 | 0.991 | 1.000 | 0.227 | 1.000 | 1.000 | 1.000 | 0.037 | 1.000 | 1.000 |
| Mrg20 | 1.000 | 1.000 | 1.000 | 0.006 | 0.000 | 0.000 | 1.000 | 0.000 | 0.960 | 0.281 | 1.000 | 1.000 | 1.000 | 1.000 |
| Mrg21 | 1.000 | 1.000 | 1.000 | 1.000 | 0.000 | 0.004 | 0.572 | 0.000 | 0.971 | 0.054 | 1.000 | 1.000 | 1.000 | 0.546 |
| Mrg23 | 1.000 | 1.000 | 0.000 | 1.000 | 1.000 | 1.000 | 1.000 | 0.179 | 1.000 | 1.000 | 0.950 | 0.988 | 1.000 | 1.000 |
| Mrg24 | 1.000 | 0.995 | 1.000 | 0.000 | 0.000 | 1.000 | 1.000 | 1.000 | 0.000 | 0.995 | 0.832 | 1.000 | 1.000 | 0.988 |
| Mrg28 | 0.825 | 1.000 | 0.000 | 1.000 | 1.000 | 0.999 | 1.000 | 0.000 | 1.000 | 1.000 | 0.778 | 1.000 | 1.000 | 1.000 |
| Mrg33 | 1.000 | 0.000 | 1.000 | 0.998 | 1.000 | 1.000 | 0.000 | 1.000 | 1.000 | 1.000 | 1.000 | 0.003 | 1.000 | 0.000 |

Table S3D Homologies between *A. sativa* and *A. strigosa* X *A. wiestii*

|       | SW_1  | SW_2  | SW_3  | SW_4  | SW_5  | SW_6  | SW_7  |
|-------|-------|-------|-------|-------|-------|-------|-------|
| Mrg1  | 0.000 | 0.998 | 1.000 | 0.044 | 1.000 | 0.998 | 1.000 |
| Mrg2  | 1.000 | 0.943 | 1.000 | 1.000 | 1.000 | 1.000 | 0.000 |
| Mrg3  | 0.934 | 1.000 | 0.808 | 1.000 | 0.007 | 1.000 | 0.410 |
| Mrg4  | 1.000 | 0.904 | 1.000 | 0.751 | 0.982 | 0.000 | 0.861 |
| Mrg5  | 1.000 | 0.177 | 0.931 | 0.951 | 1.000 | 0.000 | 0.998 |
| Mrg6  | 1.000 | 1.000 | 1.000 | 0.003 | 0.000 | 1.000 | 1.000 |
| Mrg8  | 0.000 | 0.000 | 1.000 | 0.926 | 1.000 | 1.000 | 0.999 |
| Mrg9  | 0.977 | 1.000 | 0.642 | 0.441 | 0.000 | 1.000 | 1.000 |
| Mrg11 | 0.999 | 1.000 | 0.000 | 0.672 | 0.999 | 0.125 | 0.982 |
| Mrg12 | 0.000 | 0.982 | 1.000 | 0.990 | 1.000 | 1.000 | 0.000 |
| Mrg13 | 1.000 | 0.000 | 1.000 | 1.000 | 0.923 | 1.000 | 0.179 |
| Mrg15 | 1.000 | 1.000 | 0.000 | 1.000 | 0.847 | 1.000 | 1.000 |
| Mrg17 | 0.722 | 1.000 | 1.000 | 1.000 | 1.000 | 0.437 | 0.000 |
| Mrg18 | 0.000 | 1.000 | 1.000 | 1.000 | 1.000 | 1.000 | 1.000 |
| Mrg19 | 0.028 | 1.000 | 0.002 | 1.000 | 0.979 | 1.000 | 1.000 |
| Mrg20 | 1.000 | 1.000 | 0.994 | 0.032 | 0.000 | 0.000 | 1.000 |
| Mrg21 | 1.000 | 0.999 | 1.000 | 1.000 | 0.000 | 0.001 | 0.423 |
| Mrg23 | 1.000 | 0.999 | 0.000 | 0.932 | 1.000 | 1.000 | 1.000 |
| Mrg24 | 1.000 | 0.999 | 1.000 | 0.000 | 0.000 | 1.000 | 1.000 |
| Mrg28 | 0.996 | 1.000 | 0.000 | 1.000 | 1.000 | 0.999 | 0.968 |
| Mrg33 | 1.000 | 0.000 | 1.000 | 1.000 | 1.000 | 0.986 | 0.000 |

## Supplementary Figures

**Figure S1.** Single vs Double restriction digest GBS linkage maps in *A. barbata*. The linkage map presented in the text (Fig. 2) used the double digest GBS library preparation protocol of Poland et al.<sup>42</sup>. The linkage map from the single digest GBS protocol<sup>43</sup> gave a closely similar map. For each LG, the double digest map is shown on the left while the single digest map is on the right. Loci detected by both protocols were relatively rare (Supplemental Table S2), but reveal a strong similarity between the two maps (Blue diamonds with connector lines).

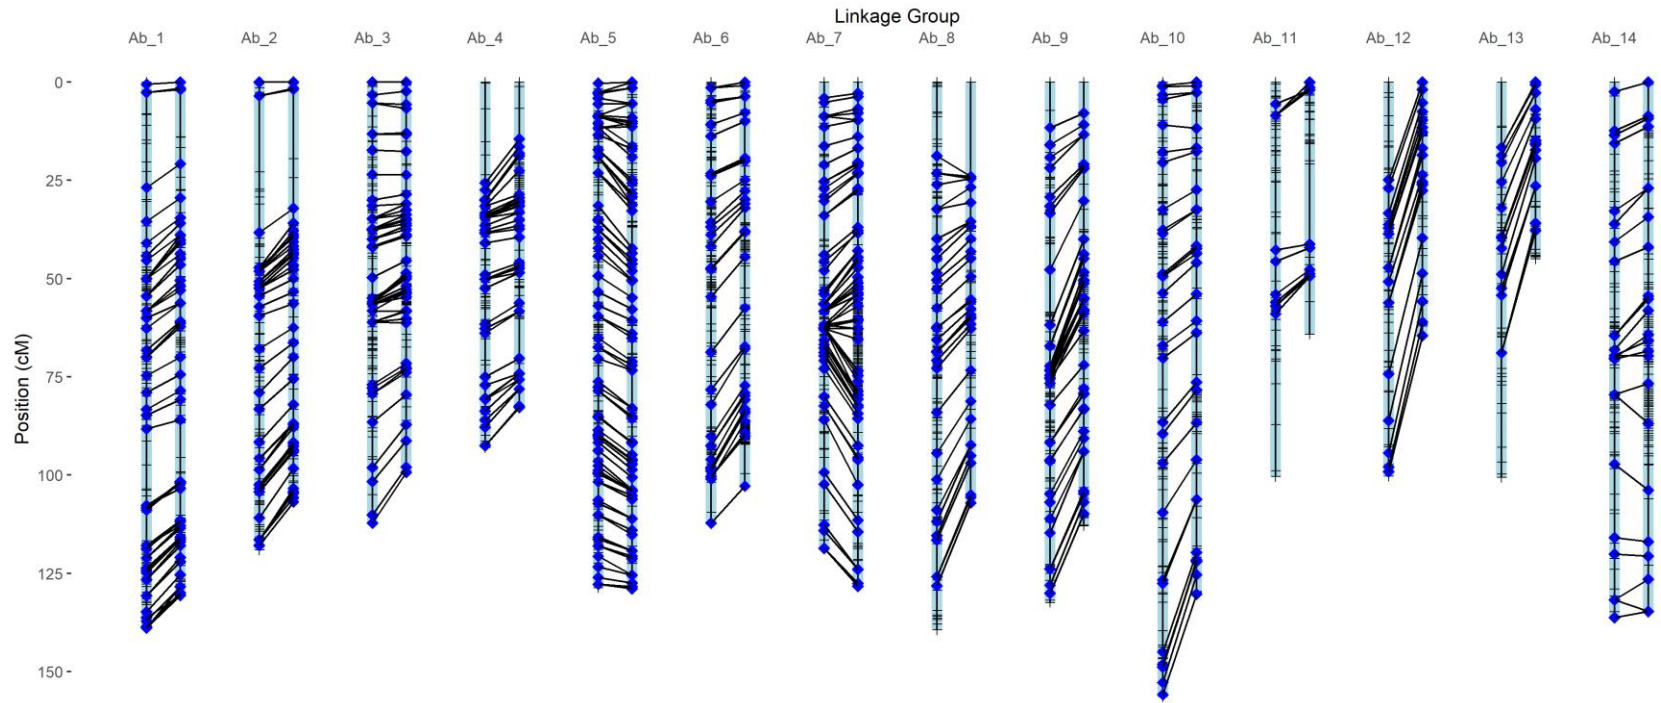

**Figure S2** Hypothesized possible evolutionary transition between A and B genome karyotypes.

Panel A (this page). Homeologous regions of the A and B genome of *A. barbata*, redrawn from Fig 4b of the main text. Linkage groups are coloured red for the A genome and blue for the B genome. Nine translocated blocks are labelled A-I. Note the similarity to Fig. 2 of Udall et al <sup>7</sup>, and Fig. 1a of Cheng et al, <sup>12</sup> in *Brassica napus*. Panel B (next page). One possible sequence of translocations rearranging the A<sub>s</sub> genome of *A. strigosa* and *A. wiestii* to the B genome of *A. barbata*. Three reciprocal translocations followed by one non reciprocal translocation (technically a reciprocal translocation where one of the exchanged fragments is very small, cf Schubert and Lysak, <sup>57</sup>) which breaks a cyclical translocation into what we've called an enchainment translocation. Chromosomal blocks are labelled following Fig. S2a and colour coded by linkage group of the A genome. Intermediate karyotypes are labeled X, Y and Z, and bold lettering indicates where the B genome chromosomes first appear in this sequence. Note however, that since any of these translocations could occur in either direction, any of these karyotypes could be ancestral. Note too that the linkage group Ab-5' resembles the arrangement seen in Mrg\_20 (A genome) and Mrg\_21 (D genome) of *A. sativa*, and we could speculate origin of those chromosomes from a karyotype similar to the "X -genome".

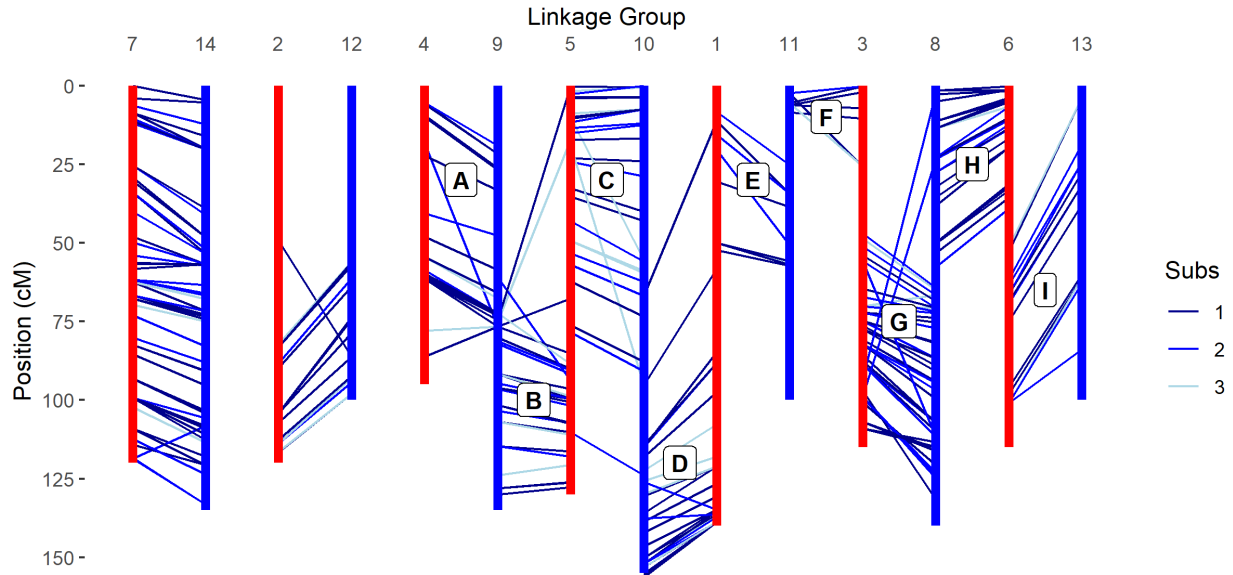

Fig S2B (Caption on prev page)

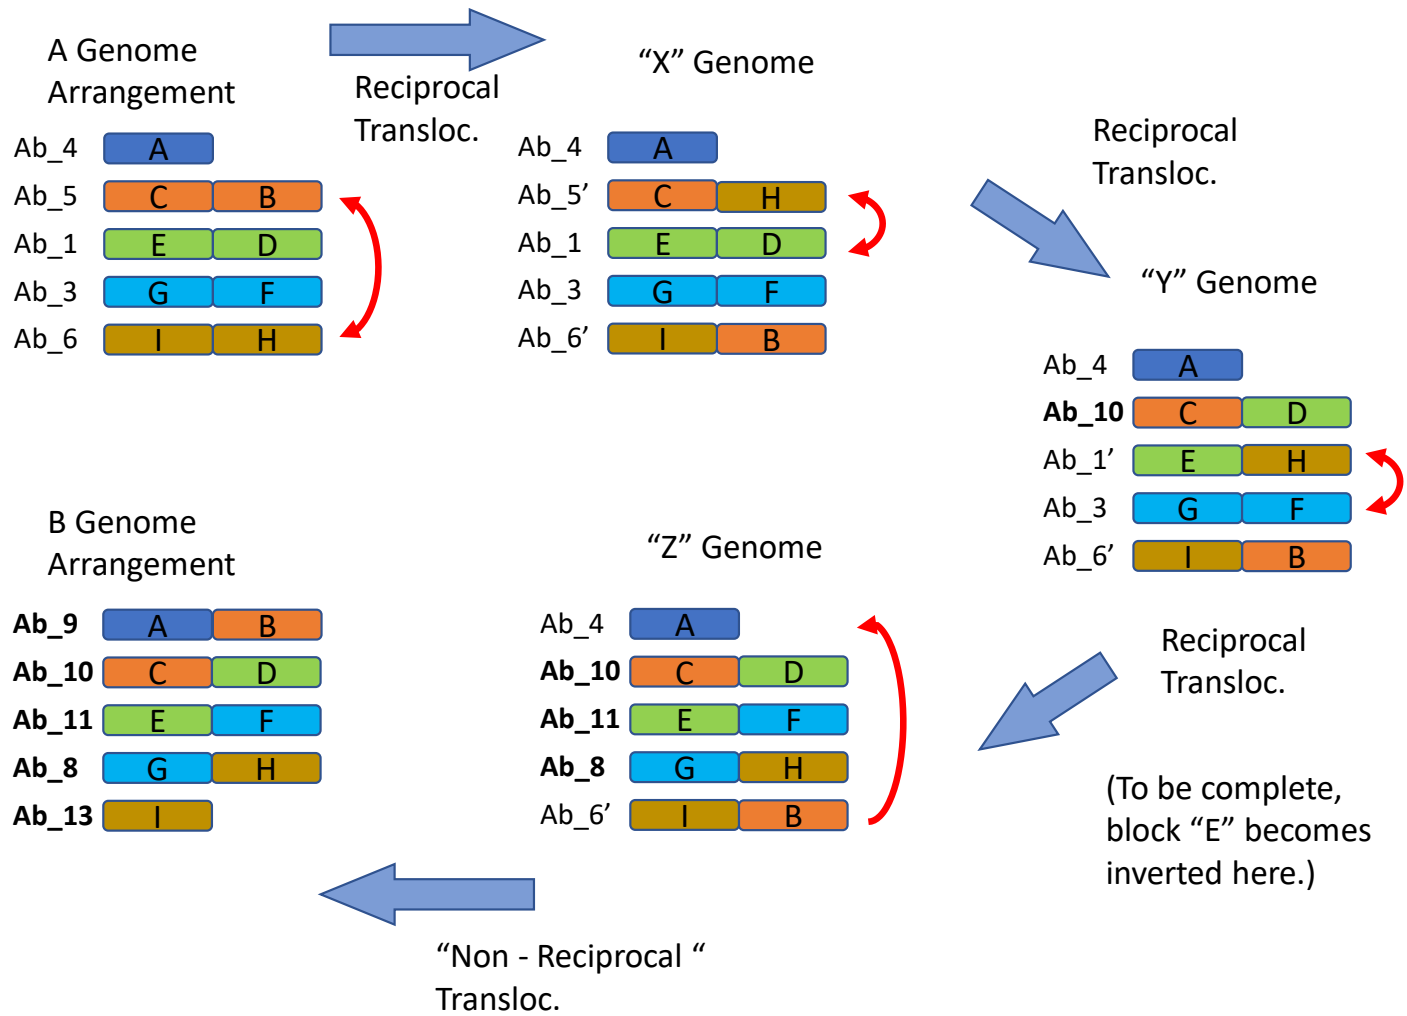

Supplement: 41598_2019_48639_MOESM2_ESM.pdf [file 41598_2019_48639_MOESM2_ESM.pdf]
